# Supplementary material for: Boronate Ester Hydrogels for Biomedical Applications: Challenges and Opportunities
Source: PubMed Central journal article supplement (PMC11270748; doi:10.1021/acs.chemmater.4c00507), 2024-07-09
Supplement: cm4c00507_si_001.pdf [file cm4c00507_si_001.pdf]

# Supporting Information

## **Boronate Ester Hydrogels for Biomedical Applications: Challenges and Opportunities**

*Léa Terriac,<sup>1</sup> Jean-Jacques Helesbeux,<sup>2</sup> Yves Maugars,<sup>1</sup> Jérôme Guicheux,<sup>1</sup>*

*Mark W. Tibbitt,<sup>3</sup> Vianney Delplace\*<sup>1</sup>*

<sup>1</sup>Nantes Université, Oniris, CHU Nantes, INSERM, Regenerative Medicine and Skeleton, RMeS, UMR 1229, F-44000 Nantes, France

<sup>2</sup>Univ Angers, SONAS, SFR QUASAV, F-49000 Angers, France

<sup>3</sup>Macromolecular Engineering Laboratory, Department of Mechanical and Process Engineering, ETH Zurich, 8092 Zurich, Switzerland

**Table S1- Potential PBAs and diols for innovative BE hydrogel design.**

|                                                  | PBA                                                                                 | Primary amine containing molecule                                                  | Diol                                                                                | Product                                                                              | Reversibility                                                                                                                   | Ref. |
|--------------------------------------------------|-------------------------------------------------------------------------------------|------------------------------------------------------------------------------------|-------------------------------------------------------------------------------------|--------------------------------------------------------------------------------------|---------------------------------------------------------------------------------------------------------------------------------|------|
| Iminoboronate ester formation                    | 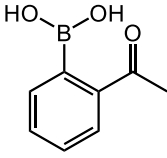   |   |                                                                                     |    | none                                                                                                                            | 1    |
|                                                  |    |   |    |    | Low reversibility<br>$K_{eq, \text{iminoboro.}} = 1100 \text{ M}^{-1}$<br>$K_{eq, \text{BE}} = 2.45 \times 10^3 \text{ M}^{-1}$ | 2    |
|                                                  |                                                                                     |  |   |   | Not measured but mentioned and implied through glucose sensitivity                                                              | 3    |
| Boronate esters using salicylic acid derivatives |  | -                                                                                  |  |  | $K_{eq} = 166 \text{ M}^{-1}$                                                                                                   | 4    |
|                                                  |  | -                                                                                  |  |  | Low reversibility<br>$K_{eq} = 1.6 \times 10^4 \text{ M}^{-1}$                                                                  | 5    |

## References

- (1) Palvai, S.; Bhangu, J.; Akgun, B.; Moody, C. T.; Hall, D. G.; Brudno, Y. In Vivo Targeting Using Arylboronate/Nopoldiol Click Conjugation. *Bioconjugate Chemistry* **2020**, *31* (10), 2288–2292. <https://doi.org/10.1021/acs.bioconjchem.0c00453>.
- (2) Chapin, B. M.; Metola, P.; Lynch, V. M.; Stanton, J. F.; James, T. D.; Anslyn, E. V. Structural and Thermodynamic Analysis of a Three-Component Assembly Forming *Ortho*-Iminophenylboronate Esters. *The Journal of Organic Chemistry* **2016**, *81* (18), 8319–8330. <https://doi.org/10.1021/acs.joc.6b01495>.
- (3) Hu, J.; Hu, Q.; He, X.; Liu, C.; Kong, Y.; Cheng, Y.; Zhang, Y. Stimuli-Responsive Hydrogels with Antibacterial Activity Assembled from Guanosine, Aminoglycoside, and a Bifunctional Anchor. *Advanced Healthcare Materials* **2020**, *9* (2), 1901329. <https://doi.org/10.1002/adhm.201901329>.
- (4) Miki, R.; Yamaki, T.; Uchida, M.; Natsume, H. Diol Responsive Viscosity Increase in a Cetyltrimethylammonium Bromide/Sodium Salicylate/3-Fluorophenylboronic Acid Micelle System. *RSC Advances* **2022**, *12* (11), 6668–6675. <https://doi.org/10.1039/D1RA08831A>.
- (5) Martínez-Aguirre, M. A.; Flores-Alamo, M.; Yatsimirsky, A. K. Thermodynamic and Structural Study of Complexation of Phenylboronic Acid with Salicylhydroxamic Acid and Related Ligands. *Applied Organometallic Chemistry* **2018**, *32* (8). <https://doi.org/10.1002/aoc.4405>.
